# Supplementary material for: A Town-Level Comprehensive Intervention Study to Reduce Salt Intake in China: Cluster Randomized Controlled Trial
Source: MDPI journal article supplement (doi:10.3390/nu14214698), 2022-11-07
Supplement: s1 [file s1]

**Table S1. Sensitivity analysis for 24-hour urinary measurements from covariates-adjusted mixed linear model in baseline and 12-month survey**

| Primary and secondary outcomes          | Control                         |                                                  | Intervention                    |                                                  | Difference of change*<br>(intervention <i>vs</i> control)<br>(95% CI) | <i>p</i> -value |
|-----------------------------------------|---------------------------------|--------------------------------------------------|---------------------------------|--------------------------------------------------|-----------------------------------------------------------------------|-----------------|
|                                         | No. in<br>baseline/12<br>months | Model-based change<br>from baseline*<br>(95% CI) | No. in<br>baseline/12<br>months | Model-based change<br>from baseline*<br>(95% CI) |                                                                       |                 |
| Including possible incomplete 24h urine |                                 |                                                  |                                 |                                                  |                                                                       |                 |
| Urinary sodium (mmol/24h)               | 1347/1223                       | -6.26(-11.26 to -1.26)                           | 1346/1233                       | -2.80(-7.80 to 2.19)                             | 3.45(−3.61 to 10.52)                                                  | 0.33            |
| Urinary potassium (mmol/24h)            | 1347/1223                       | -2.11(-3.15 to -1.07)                            | 1346/1233                       | 0.02(-1.02 to 1.06)                              | 2.13(0.66 to 3.60)                                                    | 0.005           |
| sodium-to-potassium ratio               | 1347/1223                       | 0.09(-0.05 to 0.23)                              | 1346/1233                       | -0.05(-0.19 to 0.09)                             | -0.14(-0.35 to 0.06)                                                  | 0.16            |
| Completers                              |                                 |                                                  |                                 |                                                  |                                                                       |                 |
| Urinary sodium (mmol/24h)               | 1144/1144                       | -4.19(-9.41 to 1.03)                             | 1153/1153                       | -0.29(-5.49 to 4.91)                             | 3.90(-3.47 to 11.27)                                                  | 0.30            |
| Urinary potassium (mmol/24h)            | 1144/1144                       | -1.63(-2.71 to -0.55)                            | 1153/1153                       | 0.48(-0.59 to 1.56)                              | 2.12(0.60 to 3.64)                                                    | 0.006           |
| sodium-to-potassium ratio               | 1144/1144                       | 0.09(-0.06 to 0.24)                              | 1153/1153                       | -0.06(-0.21 to 0.09)                             | 0.15(-0.36 to 0.06)                                                   | 0.16            |

\* Model-based change for urinary outcomes are adjusted for age categories, sex, BMI at baseline and follow-up.

Table S2. Salt intake (g/day) as measured by 24-hour urinary sodium excretion by subgroup in baseline and 12-month survey

|                         | Control                             |                                     |                                                  | Intervention                        |                                     |                                                  | Adjust difference *<br>(intervention vs control)<br>(95% CI) | p-value |
|-------------------------|-------------------------------------|-------------------------------------|--------------------------------------------------|-------------------------------------|-------------------------------------|--------------------------------------------------|--------------------------------------------------------------|---------|
|                         | Baseline<br><i>n</i> ,<br>Mean (SD) | 12-Month<br><i>n</i> ,<br>Mean (SD) | Model-based change<br>from baseline*<br>(95% CI) | Baseline<br><i>n</i> ,<br>Mean (SD) | 12-Month<br><i>n</i> ,<br>Mean (SD) | Model-based change<br>from baseline*<br>(95% CI) |                                                              |         |
| <b>Sex</b>              |                                     |                                     |                                                  |                                     |                                     |                                                  |                                                              |         |
| Male                    | 656 12.0(5.1)                       | 562 11.9( 5.1)                      | -0.15(-0.60, 0.30)                               | 646 11.7(4.7)                       | 566 11.8(5.3)                       | 0.15(-0.30, 0.60)                                | 0.30(-0.33, 0.93)                                            | 0.35    |
| Female                  | 671 11.0(4.4)                       | 597 10.7(4.2)                       | -0.32(-0.71, 0.07)                               | 669 10.5(4.2)                       | 610 10.4(4.2)                       | -0.17(-0.56, 0.21)                               | 0.15(-0.40, 0.70)                                            | 0.60    |
| <b>Age</b>              |                                     |                                     |                                                  |                                     |                                     |                                                  |                                                              |         |
| <40                     | 405 11.8(4.7)                       | 323 11.7(4.7)                       | -0.21(-0.80, 0.38)                               | 343 11.2(4.8)                       | 263 11.4(5.1)                       | 0.11(-0.53, 0.76)                                | 0.32(0.56, 1.20)                                             | 0.47    |
| 40-<60                  | 547 11.6(4.8)                       | 582 11.3(4.8)                       | -0.35(-0.77, 0.07)                               | 700 11.3(4.4)                       | 642 11.3(4.9)                       | -0.02(-0.42, 0.39)                               | 0.33(-0.24, 0.91)                                            | 0.26    |
| ≥60                     | 265 10.7(4.6)                       | 254 10.6(4.5)                       | -0.08(-0.68, 0.50)                               | 272 10.4(4.3)                       | 271 10.2(4.2)                       | -0.16(-0.74, 0.42)                               | -0.08(-0.90, 0.75)                                           | 0.86    |
| <b>Education level</b>  |                                     |                                     |                                                  |                                     |                                     |                                                  |                                                              |         |
| Primary school or lower | 534 11.9(4.9)                       | 462 11.6(5.0)                       | -0.36(-0.84, 0.10)                               | 583 11.0(4.6)                       | 507 10.9 (4.4)                      | -0.08(-0.53, 0.37)                               | 0.28(-0.37, 0.94)                                            | 0.39    |
| Secondary school        | 527 11.5(4.9)                       | 462 11.3(4.7)                       | -0.04(-0.53, 0.44)                               | 490 11.4(4.6)                       | 438 11.5(5.2)                       | 0.01(-0.49, 0.52)                                | 0.06(-0.65, 0.76)                                            | 0.87    |
| High school             | 154 11.0(4.4)                       | 141 10.7(4.5)                       | -0.40(-1.27, 0.47)                               | 157 11.1(4.1)                       | 157 11.4(5.4)                       | 0.25(-0.59, 1.10)                                | 0.65(-0.55, 1.87)                                            | 0.29    |
| University or college   | 112 10.0(3.2)                       | 94 10.1(3.5)                        | -0.04(-0.87, 0.79)                               | 85 10.1(4.3)                        | 74 9.3(3.4)                         | -0.73(-1.68, 0.21)                               | -0.69(-1.95,0.56)                                            | 0.27    |

SD=standard deviation.

\* Model-based change for urinary outcomes are adjusted for age categories, sex, BMI at baseline and follow-up.
